# Supplementary material for: The efficient treatment of pickling wastewater using a self-assembled in situ polymerized ceramic membrane with graphene/carbon nanotubes/polypyrrole
Source: Royal Society of Chemistry journal article supplement (doi:10.1039/d2ew00954d), 2023-01-01
Supplement: d2ew00954d1.pdf [file d2ew00954d1.pdf]

1  
2  
3  
4  
5  
6  
7  
8  
9  
10  
11  
12  
13  
14  
15  
16  
17  
18  
19  
20  
21  
22

## Supporting Information

### Preparation and application of in situ polymerization self-assembly conductive ceramic membranes via graphene/carbon nanotube/polypyrrole

Xinling Wang <sup>a</sup>, Chunhui Zhang <sup>a\*</sup>, Zong Liu <sup>a,b</sup>, Bingxu Quan <sup>a</sup>, Wenjing Lu <sup>a</sup>,  
Xuezhi Li <sup>a</sup>, Peidong Su <sup>a\*</sup>, Yuanhui Tang <sup>a</sup>, Yuanqing Bu <sup>c</sup>, Rong Zhou <sup>c</sup>

<sup>a</sup> College of Chemistry and Environmental Engineering, China University of Mining  
and Technology, Beijing 100083, China;

<sup>b</sup> Beijing Tianma Intelligent Control Technology Co., Ltd. Beijing 101399, China;

<sup>c</sup> Key Laboratory of Pesticide Environmental Assessment and Pollution Control,  
Nanjing Institute of Environmental Science, Ministry of Ecology and Environment,  
Nanjing, China;

\* Correspondence: Room 607, Yifu Science & Research Building, Ding 11 Xueyuan  
Road, 100083, Beijing, China. Tel/fax: +86 10 6233 9331; Chunhui Zhang.

**2 Tables**

**5 Figure**

**Table 1** Analysis of Variance for Quadratic model of square resistance

| Source                           | Sum of Squares | df | Mean Square | F-value    | Prob>F   |
|----------------------------------|----------------|----|-------------|------------|----------|
| Model                            | 1.088E+006     | 9  | 1.209E+005  | 14.25      | 0.0010   |
| A-GO-CNTs doping amount          | 37531.15       | 1  | 37531.15    | 4.30       | 0.0735   |
| B- oxidation polymerization time | 1.413E+005     | 1  | 1.413E+005  | 16.66      | 0.0047   |
| C-Py concentration               | 5.496E+005     | 1  | 5.496E+005  | 64.80      | < 0.0001 |
| AB                               | 3918.76        | 1  | 3918.76     | 0.46       | 0.5185   |
| AC                               | 5704.03        | 1  | 5704.03     | 0.67       | 0.4392   |
| BC                               | 1.241E+005     | 1  | 1.241E+005  | 14.63      | 0.0065   |
| A <sup>2</sup>                   | 27.40          | 1  | 27.40       | 3.231E-005 | 0.9563   |
| B <sup>2</sup>                   | 36323.71       | 1  | 36323.71    | 4.28       | 0.0773   |
| C <sup>2</sup>                   | 1.786E+005     | 1  | 1.786E+005  | 21.05      | 0.0025   |

**Table S2** Analysis of Variance for Quadratic model of membrane pure water flux

| Source                           | Sum of Squares | df | Mean Square | F-value    | Prob>F   |
|----------------------------------|----------------|----|-------------|------------|----------|
| Model                            | 57869.61       | 9  | 642.96      | 157.99     | < 0.0001 |
| A-GO-CNTs doping amount          | 1262.53        | 1  | 1262.53     | 31.02      | 0.0008   |
| B- oxidation polymerization time | 23620.51       | 1  | 23620.51    | 580.37     | < 0.0001 |
| C-Py concentration               | 25969.20       | 1  | 25969.20    | 638.07     | < 0.0001 |
| AB                               | 71.40          | 1  | 71.40       | 1.75       | 0.2269   |
| AC                               | 0.25           | 1  | 0.25        | 6.143E-003 | 0.9397   |
| BC                               | 0.090          | 1  | 0.090       | 2.211E-003 | 0.9638   |
| A <sup>2</sup>                   | 4258.52        | 1  | 4258.52     | 104.63     | < 0.0001 |
| B <sup>2</sup>                   | 120.63         | 1  | 120.63      | 2.96       | 0.1288   |
| C <sup>2</sup>                   | 2061.58        | 1  | 2061.58     | 50.65      | 0.0002   |

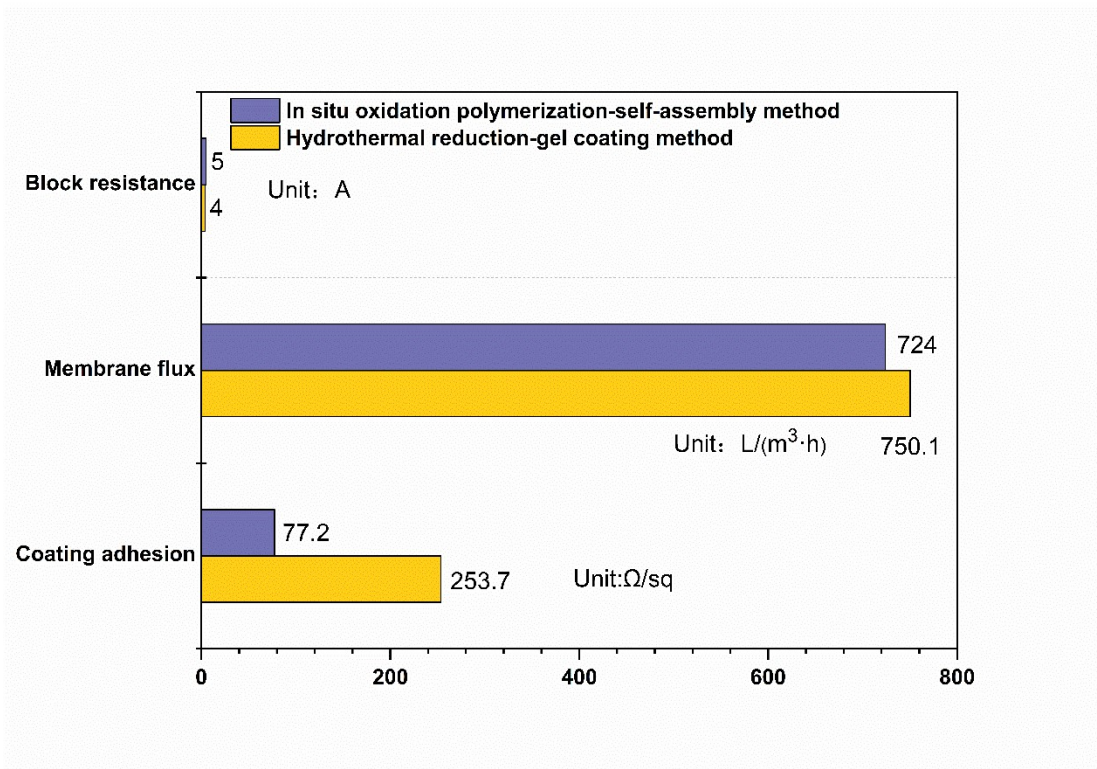

27

28

Fig. S1. The properties of membrane materials under different preparation methods

29

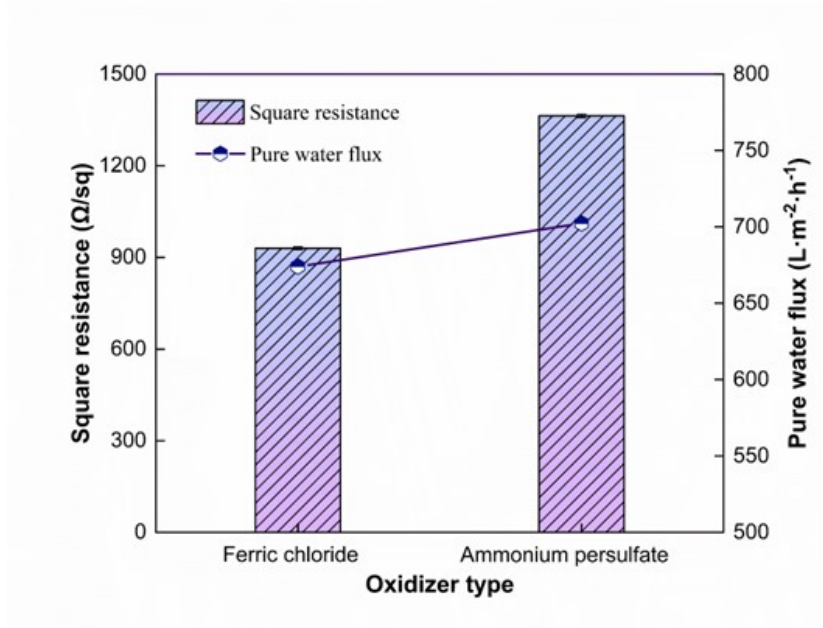

30  
31  
32

Fig. S2 Effect of oxidant types on the properties of membrane materials.

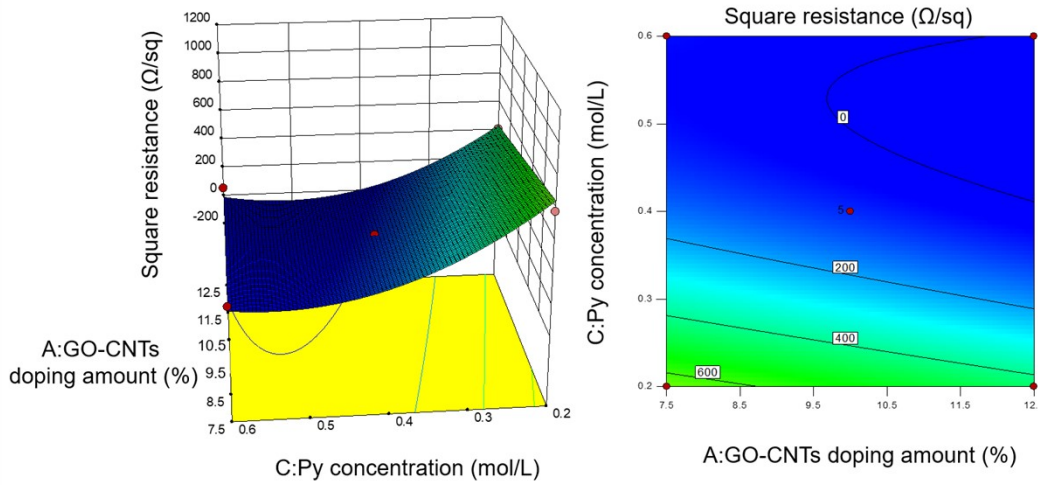

33

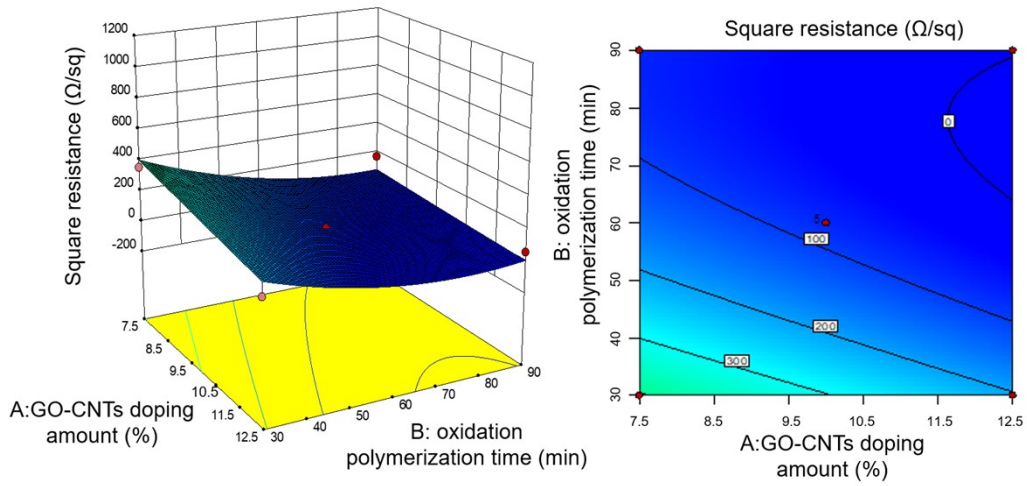

34

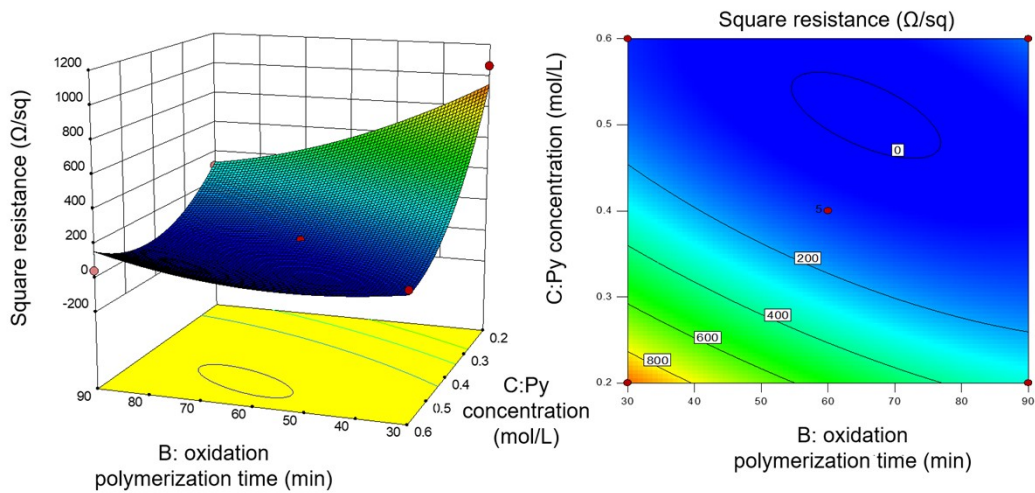

35

36

Fig. S2. 3D response surface for Quadratic model of square resistance

37

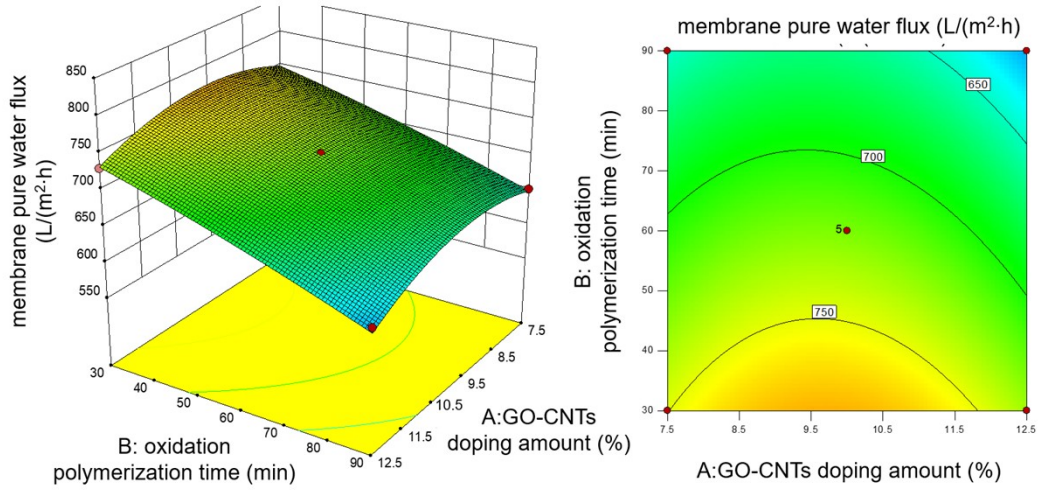

38

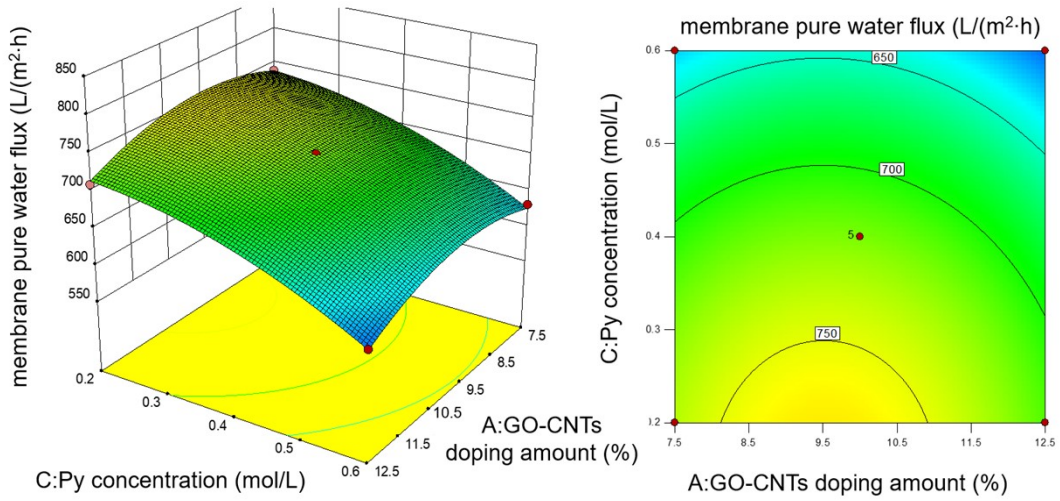

39

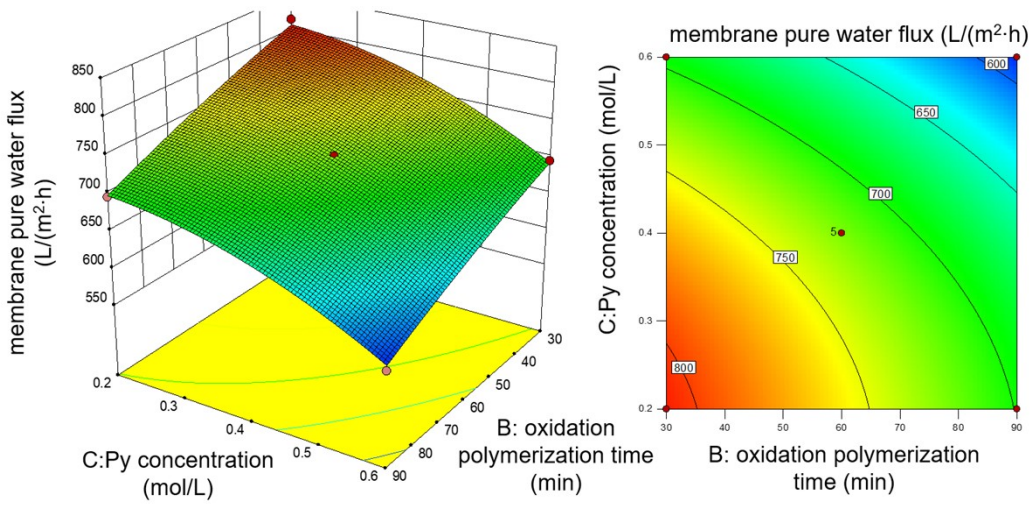

40

41

Fig. S3. 3D response surface for Quadratic model of membrane pure water flux

42 Fig. S4 shows the changes in the crystal structure of the membrane material before  
43 and after the modification. The diffraction peak in Fig. S4a is relatively sharp,  
44 indicating the existence of a relatively well-grown crystal structure on the surface of  
45 the membrane material. The analysis by Jade software reveals that the original ceramic  
46 membrane substrate surface is mainly composed of  $\text{Al}_2\text{O}_3$  crystals and contains a small  
47 amount of  $\text{SiO}_2$  and  $\text{ZrO}_2$  crystals. In the XRD spectrum of the modified conductive  
48 ceramic composite membrane surface (Fig. S4b), it can be found that the broad and  
49 comprehensive diffraction peak near  $2\theta$  of  $24^\circ$  is the characteristic diffraction peak of  
50 PPy, which indicates that the PPy of the membrane surface has an amorphous and  
51 amorphous structure. The weak dispersion peaks near  $2\theta$  of  $26^\circ$  and  $44^\circ$  are rGO and  
52 CNTs diffraction peaks [48], indicating that rGO and CNTs are successfully doped into  
53 the PPy structure. After modification by rGO-CNTs-PPy, the diffraction peaks of  $\text{Al}_2\text{O}_3$   
54 and  $\text{SiO}_2$  disappeared, suggesting that rGO-CNTs-PPy is cross-linked with  $\text{Al}_2\text{O}_3$  and  
55  $\text{SiO}_2$  crystals to form a three-dimensional mesh structure.

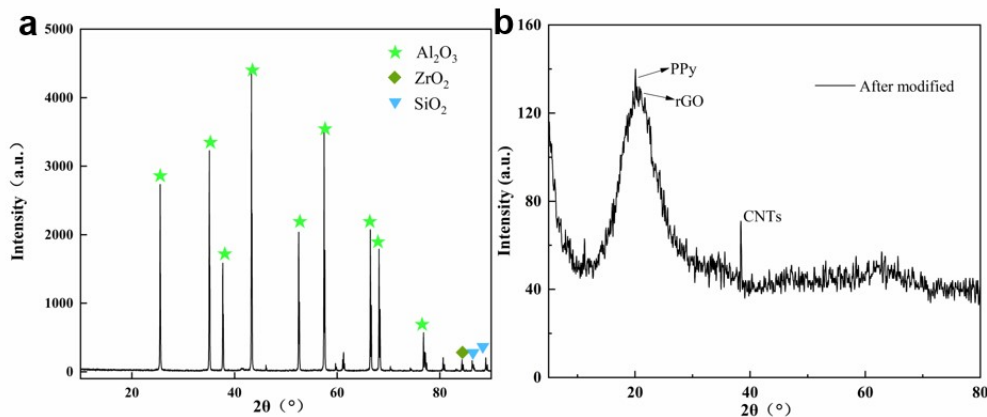

56  
57  
58

Fig. S4. (a, b) XRD image of ceramic membrane before and after modification.



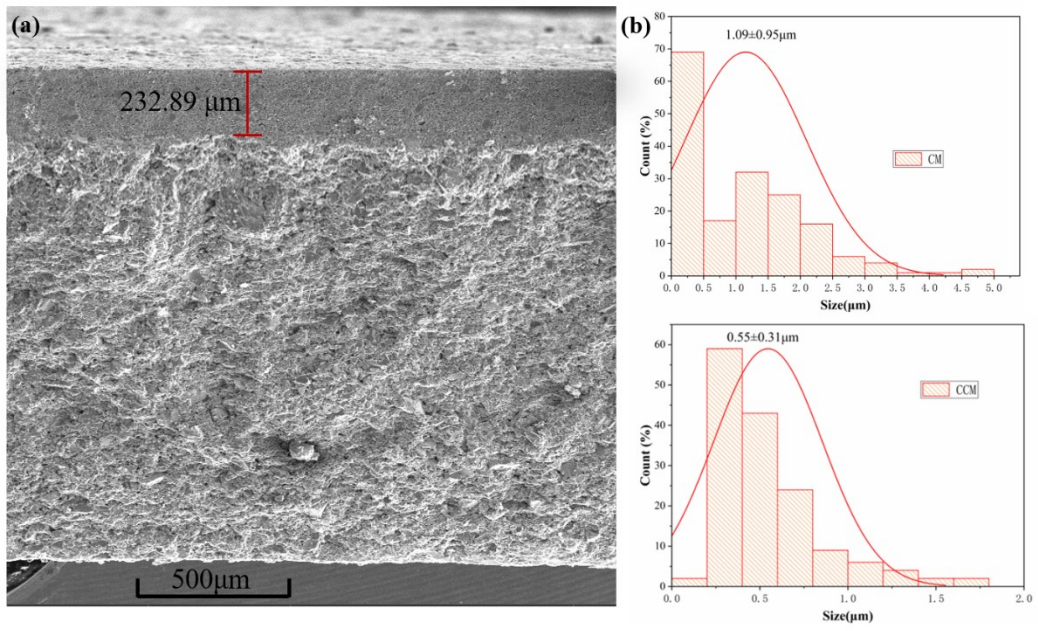

**Fig. S5.** (a) SEM image of modified ceramic membrane cross-section; (b) Pore size distribution of ceramic and modified ceramic membranes.

59  
60  
61  
62
